# Supplementary material
Source: MDPI journal article supplement (https://www.mdpi.com/1099-4300/20/3/155)
Supplement: s1 [file s1]

Article

# An Analysis of the Value of Information when Exploring Stochastic, Discrete Multi-Armed Bandits

## Supplementary Materials 1

Isaac John Sledge <sup>1,2\*</sup> and José Carlos Príncipe <sup>1,2,3\*</sup>

<sup>1</sup> Department of Electrical and Computer Engineering, University of Florida, Gainesville, FL 32611, USA;

<sup>2</sup> Computational NeuroEngineering Laboratory (CNEL), University of Florida, Gainesville, FL 32611, USA;

<sup>3</sup> Department of Biomedical Engineering, University of Florida, Gainesville, FL 32611, USA

\* Correspondence: isledge@ufl.edu (I.J.S.); principe@cnel.ufl.edu (J.C.P.)

Received: 12 October 2017; Accepted: 26 February 2018; Published: 28 February 2018

### Supplementary Materials 1

In this supplementary, we provide supplemental simulation results for the tuned versions of VoIMix and AutoVoIMix. These results are given in Tables S1–S5.

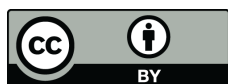

© 2018 by the authors. Licensee MDPI, Basel, Switzerland. This article is an open access article distributed under the terms and conditions of the Creative Commons Attribution (CC BY) license (<http://creativecommons.org/licenses/by/4.0/>).

| (a) Performance Difference, Increased Weighted-Random Exploration ( $\tau_k = 0.1$ to $\tau_k = 1.0$ )                           |                     |                      |
|----------------------------------------------------------------------------------------------------------------------------------|---------------------|----------------------|
| Rounds                                                                                                                           | Regret Change       | Pay-out Change       |
| 0 to 50                                                                                                                          | $+47.47 \pm 7.99\%$ | $-63.73 \pm 14.20\%$ |
| 51 to 150                                                                                                                        | $+48.79 \pm 4.96\%$ | $-75.38 \pm 9.55\%$  |
| 151 to 250                                                                                                                       | $+53.78 \pm 4.12\%$ | $-72.01 \pm 9.43\%$  |
| (b) Performance Difference, Decreased Weighted-Random Exploration ( $\tau_k = 0.1$ to $\tau_k = 0.01$ )                          |                     |                      |
| Rounds                                                                                                                           | Regret Change       | Pay-out Change       |
| 0 to 50                                                                                                                          | $+13.04 \pm 1.77\%$ | $+1.06 \pm 6.62\%$   |
| 51 to 150                                                                                                                        | $+26.10 \pm 1.82\%$ | $-7.11 \pm 5.46\%$   |
| 151 to 250                                                                                                                       | $+31.63 \pm 1.58\%$ | $-4.43 \pm 5.38\%$   |
| (c) Performance Difference, Increased Uniform-Random Exploration ( $\tau_k = 0.1$ , $\epsilon_k = 0.16$ to $\epsilon_k = 0.33$ ) |                     |                      |
| Rounds                                                                                                                           | Regret Change       | Pay-out Change       |
| 0 to 50                                                                                                                          | $+19.56 \pm 3.86\%$ | $-15.52 \pm 5.39\%$  |
| 51 to 150                                                                                                                        | $+29.02 \pm 3.34\%$ | $-22.57 \pm 4.78\%$  |
| 151 to 250                                                                                                                       | $+34.13 \pm 3.25\%$ | $-23.42 \pm 4.92\%$  |
| (d) Performance Difference, Decreased Uniform-Random Exploration ( $\tau_k = 0.1$ , $\epsilon_k = 0.16$ to $\epsilon_k = 0.01$ ) |                     |                      |
| Rounds                                                                                                                           | Regret Change       | Pay-out Change       |
| 0 to 50                                                                                                                          | $+16.07 \pm 2.08\%$ | $-6.67 \pm 4.22\%$   |
| 51 to 150                                                                                                                        | $+14.33 \pm 1.95\%$ | $-2.15 \pm 4.03\%$   |
| 151 to 250                                                                                                                       | $+13.92 \pm 1.94\%$ | $-1.64 \pm 3.92\%$   |

Table S1: VoIMix performance comparison when changing the amount of exploration. Results are averaged over the 3-, 10-, and 30-armed bandit cases. Positive regret percentages and negative pay-out percentages indicate that the change led to worse results.

| (a) Performance Difference, Best Fixed-Parameter Case ( $\tau_k = 0.1$ , $\epsilon_k = 0.16$ ) versus Tuned VoIMix     |                      |                       |
|------------------------------------------------------------------------------------------------------------------------|----------------------|-----------------------|
| Rounds                                                                                                                 | Regret Change        | Pay-out Change        |
| 0 to 5000                                                                                                              | $-52.03 \pm 45.89\%$ | $+137.31 \pm 79.18\%$ |
| 5001 to 15000                                                                                                          | $-62.19 \pm 40.14\%$ | $+144.21 \pm 66.40\%$ |
| 15001 to 25000                                                                                                         | $-67.97 \pm 36.17\%$ | $+151.10 \pm 49.72\%$ |
| (b) Performance Difference, Best Fixed-Parameter Case ( $\tau_k = 0.1$ , $\epsilon_k = 0.16$ ) versus Tuned AutoVoIMix |                      |                       |
| Rounds                                                                                                                 | Regret Change        | Pay-out Change        |
| 0 to 5000                                                                                                              | $+50.84 \pm 19.86\%$ | $-7.89 \pm 22.12\%$   |
| 5001 to 15000                                                                                                          | $+32.75 \pm 30.90\%$ | $-4.73 \pm 18.60\%$   |
| 15001 to 25000                                                                                                         | $-39.47 \pm 10.23\%$ | $+33.57 \pm 10.56\%$  |

Table S2: Fixed-parameter VoIMix versus automatically-tuned-parameter VoIMix/AutoVoIMix performance comparison. Results are averaged over the 3-, 10-, and 30-armed bandit cases. Positive regret percentages and negative pay-out percentages indicate that the change led to worse results.

| (a) Tuned VoIMix Performance Difference, Shorter Exploration Phase ( $d \approx 0$ )                   |                     |                     |
|--------------------------------------------------------------------------------------------------------|---------------------|---------------------|
| Rounds                                                                                                 | Regret Change       | Pay-out Change      |
| 0 to 5000                                                                                              | $-5.24 \pm 3.12\%$  | $+8.63 \pm 4.27\%$  |
| 5001 to 15000                                                                                          | $+6.39 \pm 3.86\%$  | $-10.04 \pm 6.05\%$ |
| 15001 to 25000                                                                                         | $+12.51 \pm 4.75\%$ | $-18.95 \pm 7.84\%$ |
| (b) Tuned VoIMix Performance Difference, Longer Exploration Phase ( $d \approx \min_j \mu^* - \mu^j$ ) |                     |                     |
| Rounds                                                                                                 | Regret Change       | Pay-out Change      |
| 0 to 5000                                                                                              | $+6.95 \pm 2.27\%$  | $-4.32 \pm 2.95\%$  |
| 5001 to 15000                                                                                          | $+18.43 \pm 4.82\%$ | $-21.91 \pm 4.93\%$ |
| 15001 to 25000                                                                                         | $+25.67 \pm 6.79\%$ | $-32.07 \pm 6.45\%$ |

Table S3: VoIMix performance comparison when changing the exploration duration. Results are averaged over the 3-, 10-, and 30-armed bandit cases. Positive regret percentages and negative pay-out percentages indicate that the change led to worse results.

| (a) Tuned AutoVoIMix Performance Difference, Longer Exploration Phase/Log Regret ( $\theta \approx 0$ )            |                     |                     |
|--------------------------------------------------------------------------------------------------------------------|---------------------|---------------------|
| Rounds                                                                                                             | Regret Change       | Pay-out Change      |
| 0 to 5000                                                                                                          | $+6.91 \pm 3.56\%$  | $-9.13 \pm 5.12\%$  |
| 5001 to 15000                                                                                                      | $+8.35 \pm 4.27\%$  | $-11.42 \pm 6.87\%$ |
| 15001 to 25000                                                                                                     | $+15.08 \pm 5.02\%$ | $-23.20 \pm 6.41\%$ |
| (b) Tuned AutoVoIMix Performance Difference, Shorter Exploration Phase/Log-Squared Regret ( $\theta \approx 0.5$ ) |                     |                     |
| Rounds                                                                                                             | Regret Change       | Pay-out Change      |
| 0 to 5000                                                                                                          | $+5.73 \pm 2.56\%$  | $-3.75 \pm 3.19\%$  |
| 5001 to 15000                                                                                                      | $+19.65 \pm 4.92\%$ | $-23.19 \pm 4.48\%$ |
| 15001 to 25000                                                                                                     | $+24.38 \pm 6.08\%$ | $-31.25 \pm 6.63\%$ |

Table S4: AutoVoIMix performance comparison when changing the exploration duration. Results are averaged over the 3-, 10-, and 30-armed bandit cases. Positive regret percentages and negative pay-out percentages indicate that the change led to worse results.

| (a) VoIMix Performance Difference, Fixed Hyperparameter Case versus Automatically Tuned     |                     |                     |
|---------------------------------------------------------------------------------------------|---------------------|---------------------|
| Rounds                                                                                      | Regret Change       | Pay-out Change      |
| 0 to 5000                                                                                   | $-19.43 \pm 5.26\%$ | $+23.91 \pm 7.02\%$ |
| 5001 to 15000                                                                               | $-25.15 \pm 5.81\%$ | $+31.58 \pm 7.36\%$ |
| 15001 to 25000                                                                              | $-29.09 \pm 6.09\%$ | $+36.22 \pm 7.85\%$ |
| (b) AutoVoIMix Performance Difference, Fixed Hyperparameter Case versus Automatically Tuned |                     |                     |
| Rounds                                                                                      | Regret Change       | Pay-out Change      |
| 0 to 5000                                                                                   | $-10.82 \pm 5.12\%$ | $+15.12 \pm 6.13\%$ |
| 5001 to 15000                                                                               | $-14.38 \pm 5.50\%$ | $+19.17 \pm 6.76\%$ |
| 15001 to 25000                                                                              | $-18.21 \pm 6.14\%$ | $+23.92 \pm 7.07\%$ |

Table S5: Fixed-hyperparameter versus automatically-tuned-hyperparameter performance comparison. Results are averaged over the 3-, 10-, and 30-armed bandit cases. Negative regret percentages and positive pay-out percentages indicate that the change led to better results.
